# Supplementary material for: Unraveling the Pathogenetic Mechanisms Underlying the Association between Specific Mitochondrial DNA Haplogroups and Parkinson’s Disease
Source: MDPI journal article supplement (doi:10.3390/cells13080694), 2024-04-17
Supplement: s1 [file s1]

## Supplemental tables and figures

### Supplemental Table S1. For the identified DEGs from the transcriptome results of W3 cybrid.

| W3 cybrid | gene_id          | Ensembl Protein ID | Description                                                                            | Gene type      |
|-----------|------------------|--------------------|----------------------------------------------------------------------------------------|----------------|
| W3-01     | ENSG00000013441  | ENSP000000479484   | CDC like kinase 1 [Source:HGNC Symbol;Acc:HGNC:2068]                                   | protein_coding |
| W3-02     | ENSG00000014257  | ENSP000000422036   | acid phosphatase, prostate [Source:HGNC Symbol;Acc:HGNC:125]                           | protein_coding |
| W3-03     | ENSG000000059728 | ENSP000000443935   | MAX dimerization protein 1 [Source:HGNC Symbol;Acc:HGNC:6761]                          | protein_coding |
| W3-04     | ENSG000000068784 | -                  | S1 RNA binding domain 1 [Source:HGNC Symbol;Acc:HGNC:25521]                            | protein_coding |
| W3-05     | ENSG000000170669 | ENSP000000175506   | asparagine synthetase (glutamine-hydrolyzing) [Source:HGNC Symbol;Acc:HGNC:753]        | protein_coding |
| W3-06     | ENSG000000087074 | ENSP000000469239   | protein phosphatase 1 regulatory subunit 15A [Source:HGNC Symbol;Acc:HGNC:14375]       | protein_coding |
| W3-07     | ENSG000000087494 | ENSP000000201015   | parathyroid hormone-like hormone [Source:HGNC Symbol;Acc:HGNC:9607]                    | protein_coding |
| W3-08     | ENSG000000088726 | -                  | transmembrane protein 40 [Source:HGNC Symbol;Acc:HGNC:25620]                           | protein_coding |
| W3-09     | ENSG000000095739 | -                  | BMP and activin membrane-bound inhibitor [Source:HGNC Symbol;Acc:HGNC:30251]           | protein_coding |
| W3-10     | ENSG000000095752 | ENSP000000468663   | interleukin 11 [Source:HGNC Symbol;Acc:HGNC:5966]                                      | protein_coding |
| W3-11     | ENSG000000099860 | ENSP000000468374   | growth arrest and DNA damage inducible beta [Source:HGNC Symbol;Acc:HGNC:4096]         | protein_coding |
| W3-12     | ENSG000000108342 | ENSP000000462991   | colony stimulating factor 3 [Source:HGNC Symbol;Acc:HGNC:2438]                         | protein_coding |
| W3-13     | ENSG000000108691 | -                  | chemokine (C-C motif) ligand 2 [Source:HGNC Symbol;Acc:HGNC:10618]                     | protein_coding |
| W3-14     | ENSG000000111981 | ENSP000000229708   | UL16 binding protein 1 [Source:HGNC Symbol;Acc:HGNC:14893]                             | protein_coding |
| W3-15     | ENSG000000116717 | ENSP000000482814   | growth arrest and DNA damage inducible alpha [Source:HGNC Symbol;Acc:HGNC:4095]        | protein_coding |
| W3-16     | ENSG000000118523 | ENSP000000356954   | connective tissue growth factor [Source:HGNC Symbol;Acc:HGNC:2500]                     | protein_coding |
| W3-17     | ENSG000000120217 | ENSP000000370985   | CD274 molecule [Source:HGNC Symbol;Acc:HGNC:17635]                                     | protein_coding |
| W3-18     | ENSG000000121966 | -                  | chemokine (C-X-C motif) receptor 4 [Source:HGNC Symbol;Acc:HGNC:2561]                  | protein_coding |
| W3-19     | ENSG000000125845 | ENSP000000368104   | bone morphogenetic protein 2 [Source:HGNC Symbol;Acc:HGNC:1069]                        | protein_coding |
| W3-20     | ENSG000000126217 | ENSP000000364754   | MCF.2 cell line derived transforming sequence like [Source:HGNC Symbol;Acc:HGNC:14576] | protein_coding |
| W3-21     | ENSG000000128016 | ENSP000000470200   | ZFP36 ring finger protein [Source:HGNC Symbol;Acc:HGNC:12862]                          | protein_coding |
| W3-22     | ENSG000000130513 | -                  | growth differentiation factor 15 [Source:HGNC Symbol;Acc:HGNC:30142]                   | protein_coding |
| W3-23     | ENSG000000132002 | -                  | DnaJ heat shock protein family (Hsp40) member B1 [Source:HGNC Symbol;Acc:HGNC:5270]    | protein_coding |
| W3-24     | ENSG000000135069 | ENSP000000365773   | phosphoserine aminotransferase 1 [Source:HGNC Symbol;Acc:HGNC:19129]                   | protein_coding |
| W3-25     | ENSG000000136158 | ENSP000000439027   | sprouty RTK signaling antagonist 2 [Source:HGNC Symbol;Acc:HGNC:11270]                 | protein_coding |
| W3-26     | ENSG000000136826 | ENSP000000483629   | Kruppel-like factor 4 (gut) [Source:HGNC Symbol;Acc:HGNC:6348]                         | protein_coding |
| W3-27     | ENSG000000138166 | -                  | dual specificity phosphatase 5 [Source:HGNC Symbol;Acc:HGNC:3071]                      | protein_coding |
| W3-28     | ENSG000000139112 | ENSP000000486133   | GABA(A) receptor-associated protein like 1 [Source:HGNC Symbol;Acc:HGNC:4068]          | protein_coding |
| W3-29     | ENSG000000142408 | ENSP000000270458   | calcium channel, voltage-dependent, gamma subunit 8 [Source:HGNC Symbol;Acc:HGNC:1362] | protein_coding |
| W3-30     | ENSG000000143878 | ENSP000000272233   | ras homolog family member B [Source:HGNC Symbol;Acc:HGNC:668]                          | protein_coding |
| W3-31     | ENSG000000146197 | ENSP000000274938   | signal peptide, CUB domain, EGF-like 3 [Source:HGNC Symbol;Acc:HGNC:13655]             | protein_coding |
| W3-32     | ENSG000000147027 | ENSP000000275954   | transmembrane protein 47 [Source:HGNC Symbol;Acc:HGNC:18515]                           | protein_coding |
| W3-33     | ENSG000000148677 | ENSP000000360762   | ankyrin repeat domain 1 (cardiac muscle) [Source:HGNC Symbol;Acc:HGNC:15819]           | protein_coding |

| Associated Gene Name | EntrezGene ID | locus                 | W3-Mppt_value | W3_value | ratio(W3-Mppt/W3) | log2ratio(W3-Mppt/W3) | p_value | q_value | significant |
|----------------------|---------------|-----------------------|---------------|----------|-------------------|-----------------------|---------|---------|-------------|
| CLK1                 | 1195          | 2:200853008-200864744 | 250.475       | 48.3028  | 5.185517196       | 2.374487888           | 0.00005 | 0.02201 | yes         |
| ACPP                 | 55            | 3:132317366-132368298 | 0.0001        | 0.67618  | 0.00014789        | -12.72319163          | 0.00005 | 0.02201 | yes         |
| MXD1                 | 4084          | 2:69893559-69942945   | 32.015        | 4.68817  | 6.828890591       | 2.77165122            | 0.00005 | 0.02201 | yes         |
| SRBD1                | 55133         | 2:45388679-45612165   | 5.26388       | 20.5326  | 0.256366948       | -1.963717819          | 0.00005 | 0.02201 | yes         |
| ASNS                 | 440           | 7:97852117-97872542   | 152.508       | 32.0775  | 4.754360533       | 2.24925131            | 0.00005 | 0.02201 | yes         |
| PPP1R15A             | 23645         | 19:48872391-48876057  | 322.626       | 37.3863  | 8.629524719       | 3.109281103           | 0.00005 | 0.02201 | yes         |
| PTHLH                | 5744          | 12:27958083-27972705  | 23.632        | 2.8454   | 8.305334927       | 3.054038348           | 0.0001  | 0.0395  | yes         |
| TMEM40               | 55287         | 3:12733524-12769457   | 1.77935       | 0.0001   | 17793.5           | 14.1190627            | 0.00005 | 0.02201 | yes         |
| BAMBI                | 25805         | 10:28677341-28682939  | 16.3028       | 1.70119  | 9.583174131       | 3.260503583           | 0.00005 | 0.02201 | yes         |
| IL11                 | 3589          | 19:55364388-55370463  | 47.2499       | 10.5773  | 4.467104081       | 2.159339869           | 0.00005 | 0.02201 | yes         |
| GADD45B              | 4616          | 19:2476121-2478259    | 124.358       | 15.8432  | 7.849298122       | 2.972563655           | 0.00005 | 0.02201 | yes         |
| CSF3                 | 1440          | 17:40015360-40017813  | 17.208        | 146.436  | 0.117512087       | -3.089118936          | 0.00005 | 0.02201 | yes         |
| CCL2                 | 6347          | 17:34255217-34257203  | 10.5149       | 105.545  | 0.099624805       | -3.327351201          | 0.00005 | 0.02201 | yes         |
| ULBP1                | 80329         | 6:149964006-149973710 | 25.1591       | 4.81503  | 5.225118016       | 2.385463623           | 0.00005 | 0.02201 | yes         |
| GADD45A              | 1647          | 1:67685060-67688338   | 274.171       | 61.3048  | 4.472259921       | 2.161004038           | 0.00005 | 0.02201 | yes         |
| CTGF                 | 1490          | 6:131948175-132077393 | 581.079       | 137.516  | 4.225537392       | 2.079134831           | 0.00005 | 0.02201 | yes         |
| CD274                | 29126         | 9:5450502-5470566     | 34.488        | 2.77982  | 12.4065587        | 3.633031095           | 0.00005 | 0.02201 | yes         |
| CXCR4                | 7852          | 2:136114348-136118165 | 11.8436       | 1.22032  | 9.705323194       | 3.278776256           | 0.00005 | 0.02201 | yes         |
| BMP2                 | 650           | 20:6767663-6780280    | 10.3567       | 1.63619  | 6.329766103       | 2.66215219            | 0.00005 | 0.02201 | yes         |
| MCF2L                | 23263         | 13:112894377-11309973 | 0.45865       | 3.94459  | 0.116273174       | -3.10440981           | 0.0001  | 0.0395  | yes         |
| ZFP36                | 7538          | 19:39406812-39409412  | 35.3832       | 5.16418  | 6.851658927       | 2.776453336           | 0.00005 | 0.02201 | yes         |
| GDF15                | 9518          | 19:18374730-18389176  | 211.193       | 7.09293  | 29.77514229       | 4.896036497           | 0.00005 | 0.02201 | yes         |
| DNAJB1               | 3337          | 19:14514769-14565980  | 122.733       | 22.1106  | 5.550867005       | 2.472713128           | 0.0001  | 0.0395  | yes         |
| PSAT1                | 29968         | 9:78297142-78330093   | 301.958       | 61.7043  | 4.893629779       | 2.290904961           | 0.00005 | 0.02201 | yes         |
| SPRY2                | 10253         | 13:80335975-80340951  | 53.5249       | 10.0306  | 5.336161346       | 2.415802289           | 0.00005 | 0.02201 | yes         |
| KLF4                 | 9314          | 9:107484851-107490482 | 12.1601       | 1.04883  | 11.59396661       | 3.535302331           | 0.00005 | 0.02201 | yes         |
| DUSP5                | 1847          | 10:110497837-11051154 | 286.954       | 52.5885  | 5.456592221       | 2.448000233           | 0.0001  | 0.0395  | yes         |
| GABARAPL1            | 23710         | 12:10212457-10223130  | 91.6159       | 13.9079  | 6.587328065       | 2.719693402           | 0.00005 | 0.02201 | yes         |
| CACNG8               | 59283         | 19:53963039-53990215  | 0.461264      | 3.69537  | 0.124822142       | -3.002054217          | 0.00005 | 0.02201 | yes         |
| RHOB                 | 388           | 2:20447073-20449445   | 115.842       | 13.2587  | 8.737055669       | 3.127147183           | 0.00005 | 0.02201 | yes         |
| SCUBE3               | 222663        | 6:35214418-35253079   | 2.43776       | 10.0934  | 0.241520201       | -2.04978423           | 0.0001  | 0.0395  | yes         |
| TMEM47               | 83604         | X:34627063-34657288   | 6.43361       | 1.21707  | 5.286146236       | 2.402216336           | 0.0001  | 0.0395  | yes         |
| ANKRD1               | 27063         | 10:90912095-90921276  | 22.3916       | 2.56051  | 8.744976587       | 3.128454522           | 0.00005 | 0.02201 | yes         |



|       |                 |                 |                                                                                                                                 |                      |
|-------|-----------------|-----------------|---------------------------------------------------------------------------------------------------------------------------------|----------------------|
| W3-34 | ENSG00000148841 | ENSP00000278071 | inositol 1,4,5-trisphosphate receptor interacting protein [Source:HGNC Symbol;Acc:HGNC:2937]                                    | protein_coding       |
| W3-35 | ENSG00000150347 | ENSP00000308862 | AT-rich interaction domain 5B [Source:HGNC Symbol;Acc:HGNC:17362]                                                               | protein_coding       |
| W3-36 | ENSG00000150102 | ENSP00000424046 | solute carrier family 7 (anionic amino acid transporter light chain, xc- system), member 11 [Source:HGNC Symbol;Acc:HGNC:31452] | protein_coding       |
| W3-37 | ENSG00000153714 | -               | leucine rich adaptor protein 1-like [Source:HGNC Symbol;Acc:HGNC:31452]                                                         | protein_coding       |
| W3-38 | ENSG00000153879 | ENSP00000466022 | CCAAT/enhancer binding protein (C/EBP), gamma [Source:HGNC Symbol;Acc:HGNC:1837]                                                | protein_coding       |
| W3-39 | ENSG00000160179 | -               | ATP binding cassette subfamily G member 1 [Source:HGNC Symbol;Acc:HGNC:73]                                                      | protein_coding       |
| W3-40 | ENSG00000163739 | ENSP00000379110 | chemokine (C-X-C motif) ligand 1 (melanoma growth stimulating activity, alpha) [Source:HGNC Symbol;Acc:HGNC:4234]               | protein_coding       |
| W3-41 | ENSG00000164949 | ENSP00000428258 | GTP binding protein overexpressed in skeletal muscle [Source:HGNC Symbol;Acc:HGNC:4234]                                         | protein_coding       |
| W3-42 | ENSG00000166189 | ENSP00000299238 | Hermansky-Pudlak syndrome 6 [Source:HGNC Symbol;Acc:HGNC:18817]                                                                 | protein_coding       |
| W3-43 | ENSG00000166750 | ENSP00000466984 | schlafen family member 5 [Source:HGNC Symbol;Acc:HGNC:28286]                                                                    | protein_coding       |
| W3-44 | ENSG00000169826 | ENSP00000363590 | chondroitin sulfate N-acetylglucosaminyltransferase 2 [Source:HGNC Symbol;Acc:HGNC:2429]                                        | protein_coding       |
| W3-45 | ENSG00000171388 | ENSP00000391800 | apelin [Source:HGNC Symbol;Acc:HGNC:16665]                                                                                      | protein_coding       |
| W3-46 | ENSG00000172216 | ENSP00000305422 | CCAAT/enhancer binding protein (C/EBP), beta [Source:HGNC Symbol;Acc:HGNC:1834]                                                 | protein_coding       |
| W3-47 | ENSG00000174343 | -               | cholinergic receptor, nicotinic alpha 9 [Source:HGNC Symbol;Acc:HGNC:14079]                                                     | protein_coding       |
| W3-48 | ENSG00000175868 | ENSP00000433490 | calcitonin-related polypeptide beta [Source:HGNC Symbol;Acc:HGNC:1438]                                                          | protein_coding       |
| W3-49 | ENSG00000176399 | ENSP00000319651 | DMRT-like family A1 [Source:HGNC Symbol;Acc:HGNC:13826]                                                                         | protein_coding       |
| W3-50 | ENSG00000177352 | ENSP00000319006 | coiled-coil domain containing 71 [Source:HGNC Symbol;Acc:HGNC:25760]                                                            | protein_coding       |
| W3-51 | ENSG00000183798 | ENSP00000332806 | elastin microfibril interfacer 3 [Source:HGNC Symbol;Acc:HGNC:16123]                                                            | protein_coding       |
| W3-52 | ENSG00000185650 | ENSP00000452119 | ZFP36 ring finger protein-like 1 [Source:HGNC Symbol;Acc:HGNC:1107]                                                             | protein_coding       |
| W3-53 | ENSG00000188229 | -               | tubulin beta 4B class IVb [Source:HGNC Symbol;Acc:HGNC:20771]                                                                   | protein_coding       |
| W3-54 | ENSG00000196668 | -               | long intergenic non-protein coding RNA 173 [Source:HGNC Symbol;Acc:HGNC:33791]                                                  | processed_transcript |
| W3-55 | ENSG00000198695 | ENSP00000354665 | mitochondrially encoded NADH:ubiquinone oxidoreductase core subunit 6 [Source:HGNC Symbol;Acc:HGNC:7421]                        | protein_coding       |
| W3-56 | ENSG00000198712 | ENSP00000354876 | mitochondrially encoded cytochrome c oxidase II [Source:HGNC Symbol;Acc:HGNC:7421]                                              | protein_coding       |
| W3-57 | ENSG00000198727 | ENSP00000354554 | mitochondrially encoded cytochrome b [Source:HGNC Symbol;Acc:HGNC:7427]                                                         | protein_coding       |
| W3-58 | ENSG00000198763 | ENSP00000355046 | mitochondrially encoded NADH:ubiquinone oxidoreductase core subunit 2 [Source:HGNC Symbol;Acc:HGNC:7419]                        | protein_coding       |
| W3-59 | ENSG00000198786 | ENSP00000354813 | mitochondrially encoded NADH:ubiquinone oxidoreductase core subunit 5 [Source:HGNC Symbol;Acc:HGNC:7419]                        | protein_coding       |
| W3-60 | ENSG00000198804 | ENSP00000354499 | mitochondrially encoded cytochrome c oxidase I [Source:HGNC Symbol;Acc:HGNC:7419]                                               | protein_coding       |
| W3-61 | ENSG00000198840 | ENSP00000355206 | mitochondrially encoded NADH:ubiquinone oxidoreductase core subunit 3 [Source:HGNC Symbol;Acc:HGNC:7419]                        | protein_coding       |
| W3-62 | ENSG00000198886 | ENSP00000354961 | mitochondrially encoded NADH:ubiquinone oxidoreductase core subunit 4 [Source:HGNC Symbol;Acc:HGNC:7419]                        | protein_coding       |
| W3-63 | ENSG00000198888 | ENSP00000354687 | mitochondrially encoded NADH:ubiquinone oxidoreductase core subunit 1 [Source:HGNC Symbol;Acc:HGNC:7419]                        | protein_coding       |
| W3-64 | ENSG00000198947 | ENSP00000478150 | dystrophin [Source:HGNC Symbol;Acc:HGNC:2928]                                                                                   | protein_coding       |
| W3-65 | ENSG00000204388 | ENSP00000364801 | heat shock protein family A (Hsp70) member 1B [Source:HGNC Symbol;Acc:HGNC:5233]                                                | protein_coding       |
| W3-66 | ENSG00000204389 | ENSP00000477378 | heat shock protein family A (Hsp70) member 1A [Source:HGNC Symbol;Acc:HGNC:5232]                                                | protein_coding       |
| W3-67 | ENSG00000209082 | -               | mitochondrially encoded tRNA leucine 1 (UUA/G) [Source:HGNC Symbol;Acc:HGNC:7490]                                               | MT_rRNA              |

|            |           |                        |          |          |             |              |         |         |     |
|------------|-----------|------------------------|----------|----------|-------------|--------------|---------|---------|-----|
| ITPR1P     | 85450     | 10:104309697-10433840  | 46.712   | 14.0429  | 3.326378455 | 1.733952319  | 0.00005 | 0.02201 | yes |
| ARID5B     | 84159     | 10:61901299-62096944   | 4.29239  | 0.500834 | 8.570484432 | 3.099376753  | 0.00005 | 0.02201 | yes |
| SLC7A11    | 23657     | 4:138027421-138242349  | 14.2348  | 2.0744   | 6.862128808 | 2.778656207  | 0.00005 | 0.02201 | yes |
| LURAP1L    | 286343    | 9:12685438-12822131    | 22.8089  | 0.9278   | 24.58385428 | 4.619639215  | 0.00005 | 0.02201 | yes |
| CEBPG      | 1054      | 19:33373329-33382686   | 53.1875  | 11.6838  | 4.552243277 | 2.186577659  | 0.00005 | 0.02201 | yes |
| ABCG1      | 9619      | 21:42199688-42297244   | 14.0804  | 1.57601  | 8.93420727  | 3.159339725  | 0.00005 | 0.02201 | yes |
| CXCL1      | 2919      | 4:73869392-73871242    | 9.83165  | 58.6515  | 0.167628279 | -2.576662543 | 0.00005 | 0.02201 | yes |
| GEM        | 2669      | 8:94249252-94262350    | 124.704  | 12.601   | 9.896357432 | 3.306897608  | 0.00005 | 0.02201 | yes |
| HPS6       | 79803     | 10:102065389-10206803  | 1.05907  | 7.06226  | 0.14996191  | -2.737331987 | 0.0001  | 0.0395  | yes |
| SLFN5      | 162394    | 17:35243035-35273655   | 1.67869  | 12.9836  | 0.129293108 | -2.951282718 | 0.00005 | 0.02201 | yes |
| CSGALNACT2 | 55454     | 10:43138485-43185308   | 51.0533  | 13.5229  | 3.775321861 | 1.916599645  | 0.00005 | 0.02201 | yes |
| APLN       | 8862      | X:129645258-129654937  | 4.90829  | 23.6466  | 0.20756853  | -2.268340366 | 0.00005 | 0.02201 | yes |
| CEBPB      | 1051      | 20:50184597-50192689   | 152.517  | 37.208   | 4.099037841 | 2.035285309  | 0.00005 | 0.02201 | yes |
| CHRNA9     | 55584     | 4:40335328-40355217    | 1.22968  | 0.0001   | 12296.8     | 13.58599531  | 0.00005 | 0.02201 | yes |
| CALCB      | 797       | 11:14904996-15082342   | 0.808505 | 0.0001   | 8085.05     | 12.98104098  | 0.00005 | 0.02201 | yes |
| DMRTA1     | 63951     | 9:22446840-22455740    | 3.27959  | 0.693683 | 4.727793531 | 2.241167033  | 0.00005 | 0.02201 | yes |
| CCDC71     | 64925     | 3:49162534-49166321    | 2.63274  | 15.1936  | 0.173279539 | -2.528826787 | 0.0001  | 0.0395  | yes |
| EMILIN3    | 90187     | 20:41340919-41366827   | 0.886341 | 4.97476  | 0.17816759  | -2.488693171 | 0.0001  | 0.0395  | yes |
| ZFP36L1    | 677       | 14:68787659-68796253   | 576.905  | 108.377  | 5.323131292 | 2.41227515   | 0.00005 | 0.02201 | yes |
| TUBB4B     | 10383     | 9:137241212-137247770  | 27.0988  | 257.259  | 0.105336645 | -3.246920677 | 0.00005 | 0.02201 | yes |
| LINC00173  | 100287569 | 12:116533421-116536511 | 0.0001   | 2.99692  | 3.33676E-05 | -14.87119295 | 0.00005 | 0.02201 | yes |
| MT-ND6     | 4541      | MT:14148-14673         | 87.5461  | 3519.1   | 0.024877412 | -5.32901979  | 0.00005 | 0.02201 | yes |
| MT-CO2     | 4513      | MT:7585-8269           | 709.505  | 12082.8  | 0.058720247 | -4.089998154 | 0.00005 | 0.02201 | yes |
| MT-CYB     | 4519      | MT:14746-15887         | 167.989  | 1891.96  | 0.088790989 | -3.493442915 | 0.00005 | 0.02201 | yes |
| MT-ND2     | 4536      | MT:4469-5511           | 181.035  | 2894.32  | 0.062548371 | -3.998883887 | 0.00005 | 0.02201 | yes |
| MT-ND5     | 4540      | MT:12336-14148         | 127.493  | 2818.88  | 0.045228247 | -4.46663212  | 0.00005 | 0.02201 | yes |
| MT-CO1     | 4512      | MT:5903-7445           | 195.844  | 8219.26  | 0.023827449 | -5.391231676 | 0.00005 | 0.02201 | yes |
| MT-ND3     | 4537      | MT:10058-10404         | 177.526  | 4193.48  | 0.04233813  | -4.562045737 | 0.00005 | 0.02201 | yes |
| MT-ND4     | 4538      | MT:10469-12137         | 1387.71  | 10653.7  | 0.130256155 | -2.940576548 | 0.00005 | 0.02201 | yes |
| MT-ND1     | 4535      | MT:3306-4262           | 248.143  | 3977.3   | 0.062389812 | -4.002545723 | 0.00005 | 0.02201 | yes |
| DMD        | 1756      | X:31097676-33339441    | 0.0001   | 0.522058 | 0.00019155  | -12.34999438 | 0.00005 | 0.02201 | yes |
| HSPA1B     | 3304      | 6:31827734-31830255    | 108.725  | 2.10084  | 51.75310828 | 5.693573608  | 0.00005 | 0.02201 | yes |
| HSPA1A     | 3303      | 6:31815463-31817946    | 87.9886  | 1.58853  | 55.38995172 | 5.791552376  | 0.00005 | 0.02201 | yes |
| MT-TL1     | -         | MT:3229-3304           | 0.0001   | 555.957  | 1.7987E-07  | -22.40654187 | 0.00005 | 0.02201 | yes |

|       |                 |                 |                                                                                       |                        |
|-------|-----------------|-----------------|---------------------------------------------------------------------------------------|------------------------|
| W3-68 | ENSG00000210127 | -               | mitochondrially encoded tRNA alanine [Source:HGNC Symbol;Acc:HGNC:7475]               | Mt_tRNA                |
| W3-69 | ENSG00000210135 | -               | mitochondrially encoded tRNA asparagine [Source:HGNC Symbol;Acc:HGNC:7493]            | Mt_tRNA                |
| W3-70 | ENSG00000210140 | -               | mitochondrially encoded tRNA cysteine [Source:HGNC Symbol;Acc:HGNC:7477]              | Mt_tRNA                |
| W3-71 | ENSG00000210144 | -               | mitochondrially encoded tRNA tyrosine [Source:HGNC Symbol;Acc:HGNC:7502]              | Mt_tRNA                |
| W3-72 | ENSG00000225614 | ENSP00000402343 | zinc finger protein 469 [Source:HGNC Symbol;Acc:HGNC:23216]                           | protein_coding         |
| W3-73 | ENSG00000227028 | -               | SLC8A1 antisense RNA 1 [Source:HGNC Symbol;Acc:HGNC:44102]                            | antisense              |
| W3-74 | ENSG00000227195 | -               | MIR663A host gene [Source:HGNC Symbol;Acc:HGNC:27662]                                 | processed_transcript   |
| W3-75 | ENSG00000233016 | -               | small nucleolar RNA host gene 7 [Source:HGNC Symbol;Acc:HGNC:28254]                   | antisense              |
| W3-76 | ENSG00000236799 | -               | -                                                                                     | lincRNA                |
| W3-77 | ENSG00000248527 | -               | mitochondrially encoded ATP synthase 6 pseudogene 1 [Source:HGNC Symbol;Acc:HGNC:445] | unprocessed_pseudogene |
| W3-78 | ENSG00000251259 | -               | -                                                                                     | lincRNA                |
| W3-79 | ENSG00000255717 | -               | small nucleolar RNA host gene 1 [Source:HGNC Symbol;Acc:HGNC:32688]                   | processed_transcript   |
| W3-80 | ENSG00000257556 | -               | -                                                                                     | lincRNA                |
| W3-81 | ENSG00000258479 | -               | long intergenic non-protein coding RNA 640 [Source:HGNC Symbol;Acc:HGNC:44291]        | lincRNA                |
| W3-82 | ENSG00000261087 | -               | -                                                                                     | lincRNA                |
| W3-83 | ENSG00000261889 | -               | -                                                                                     | lincRNA                |
| W3-84 | ENSG00000263934 | -               | small nucleolar RNA, C/D box 3A [Source:HGNC Symbol;Acc:HGNC:33189]                   | snoRNA                 |
| W3-85 | ENSG00000267247 | -               | -                                                                                     | lincRNA                |
| W3-86 | ENSG00000280325 | -               | -                                                                                     | TEC                    |

|                |           |                       |         |          |             |              |         |         |     |
|----------------|-----------|-----------------------|---------|----------|-------------|--------------|---------|---------|-----|
| MT-TA          | -         | MT:5586-5655          | 0.0001  | 834.454  | 1.19839E-07 | -22.99240109 | 0.00005 | 0.02201 | yes |
| MT-TN          | -         | MT:5656-5729          | 0.0001  | 1511.93  | 6.61406E-08 | -23.84988801 | 0.00005 | 0.02201 | yes |
| MT-TC          | -         | MT:5760-5891          | 0.0001  | 3972.1   | 2.51756E-08 | -25.24339861 | 0.0001  | 0.0395  | yes |
| MT-TY          | -         | MT:5760-5891          | 0.0001  | 11833.5  | 8.45059E-09 | -26.8183016  | 0.00005 | 0.02201 | yes |
| ZNF469         | 84627     | 16:88427470-88440757  | 0.37792 | 2.32629  | 0.1624561   | -2.621878182 | 0.00005 | 0.02201 | yes |
| SLC8A1-AS1     | 100128590 | 2:39786452-40611053   | 1.11721 | 0.0001   | 11172.1     | 13.44761277  | 0.00005 | 0.02201 | yes |
| MIR663AHG      | 284801    | 20:26186919-26251526  | 32.0613 | 2.58327  | 12.41113008 | 3.633562579  | 0.00005 | 0.02201 | yes |
| SNHG7          | 84973     | 9:136712569-136728184 | 446.492 | 56.1587  | 7.950540166 | 2.991052882  | 0.00005 | 0.02201 | yes |
| RP11-383C6.2   | 102724589 | 10:114994656-11499659 | 4.52639 | 0.0001   | 45263.9     | 15.46607327  | 0.00005 | 0.02201 | yes |
| MTATP6P1       | -         | 1:585988-859446       | 150.204 | 1546.76  | 0.097108795 | -3.364254223 | 0.00005 | 0.02201 | yes |
| AC004069.2     | -         | 4:105137279-105140619 | 0.0001  | 1.58873  | 6.29434E-05 | -13.95558634 | 0.00005 | 0.02201 | yes |
| SNHG1          | -         | 11:62851987-62855914  | 429.989 | 115.983  | 3.707345042 | 1.890386393  | 0.00005 | 0.02201 | yes |
| RP11-44N21.1   | -         | 14:105093608-10509900 | 0.0001  | 3.23173  | 3.09432E-05 | -14.98001905 | 0.00005 | 0.02201 | yes |
| LINC00640      | -         | 14:51333392-51385603  | 2.17219 | 0.0001   | 21721.9     | 14.40686268  | 0.00005 | 0.02201 | yes |
| KB-1460A1.5    | -         | 8:101166804-101169629 | 7.76    | 0.858598 | 9.037989839 | 3.176001935  | 0.00005 | 0.02201 | yes |
| RP11-473M20.16 | -         | 16:3156735-3157483    | 1.28516 | 0.0001   | 12851.6     | 13.64966036  | 0.00005 | 0.02201 | yes |
| SNORD3A        | 780851    | 17:19188015-19188714  | 20.7783 | 0.0001   | 207783      | 17.6647181   | 0.00005 | 0.02201 | yes |
| RP11-64C12.6   | -         | 18:12230410-12231573  | 0.0001  | 1.78548  | 5.60073E-05 | -14.12402435 | 0.00005 | 0.02201 | yes |
| AC074183.3     | -         | 7:84939334-84940256   | 46.1837 | 4.78677  | 9.64819701  | 3.270259366  | 0.00005 | 0.02201 | yes |
