# Supplementary material for: Unraveling the Pathogenetic Mechanisms Underlying the Association between Specific Mitochondrial DNA Haplogroups and Parkinson’s Disease
Source: MDPI journal article supplement (doi:10.3390/cells13080694), 2024-04-17
Supplement: s1 [file s1]

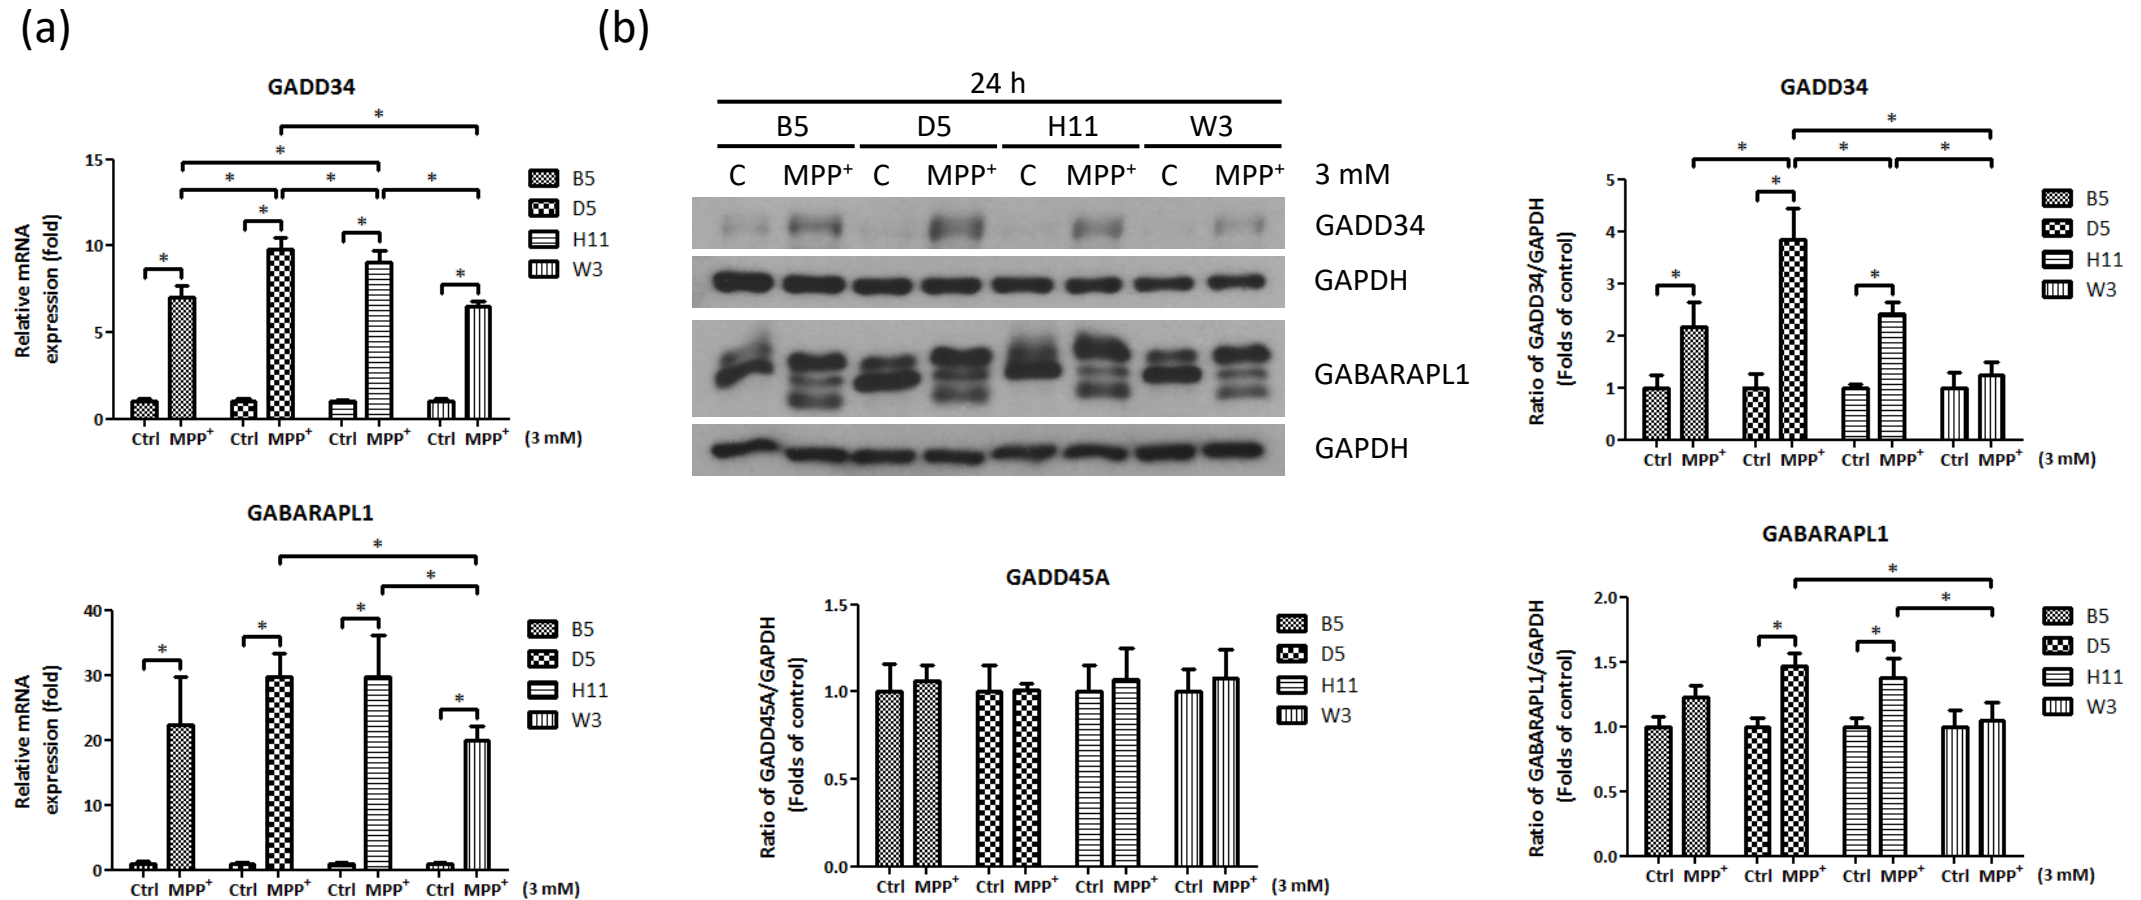

**Supplemental Figure S1. Comparison of the mRNA levels (a) and protein levels (b) of GADD34 and GABARAPL1 in B5, D5, H11 and W3 cybrid cells.** qRT-PCR analysis of gene expression in Cybrid cells treated with 3 mM MPP<sup>+</sup> for 24 h. 18S was used as internal control. Western blotting analysis of expression of GADD34 and GABARAPL1. GAPDH was as an internal loading control. Values are mean  $\pm$  SD of triplicate. A \* $p$  < 0.05 compared to the control (one-way ANOVA with Tukey's post hoc analysis).
